# Supplementary material for: Artemisinin–acetylenedicarboxylic acid cocrystal: screening, structure determination, and physicochemical property characterisation
Source: Royal Society of Chemistry journal article supplement (doi:10.1039/d1ce01400e), 2021-12-23

Supporting materials

**Artemisinin-Acetylenedicarboxylic acid Cocrystal: Screening, Structure determination, and Physicochemical Property Characterisation**

Jay Makadia<sup>a</sup>, Shadrack J. Madu<sup>a</sup>, Randolph Arroo<sup>a</sup>, Colin C. Seaton<sup>b</sup>, Mingzhong Li<sup>a\*</sup>

<sup>a</sup>School of Pharmacy, De Montfort University, Leicester, LE1 9BH, UK

<sup>b</sup>Faculty of Life Sciences, School of Chemistry and Bioscience, University of Bradford, Bradford, BD7 1DP, UK

---

\* Corresponding Author: Email: [mli@dmu.ac.uk](mailto:mli@dmu.ac.uk); Tel: +44(0)116 257 7132.

Table S1. Results of Single Crystal Structure Determination

|                                             |                                                               |
|---------------------------------------------|---------------------------------------------------------------|
| Empirical formula                           | C <sub>17</sub> H <sub>23</sub> O <sub>7</sub>                |
| Formula weight                              | 339.35                                                        |
| Temperature/K                               | 149.99                                                        |
| Crystal system                              | orthorhombic                                                  |
| Space group                                 | P2 <sub>1</sub> 2 <sub>1</sub> 2                              |
| a/Å                                         | 10.5089(4)                                                    |
| b/Å                                         | 24.0830(11)                                                   |
| c/Å                                         | 6.4952(3)                                                     |
| α/°                                         | 90                                                            |
| β/°                                         | 90                                                            |
| γ/°                                         | 90                                                            |
| Volume/Å <sup>3</sup>                       | 1643.84(12)                                                   |
| Z                                           | 4                                                             |
| ρ <sub>calc</sub> g/cm <sup>3</sup>         | 1.371                                                         |
| μ/mm <sup>-1</sup>                          | 0.106                                                         |
| F(000)                                      | 724.0                                                         |
| Crystal size/mm <sup>3</sup>                | 0.7 × 0.49 × 0.2                                              |
| Radiation                                   | MoKα (λ = 0.71073)                                            |
| 2θ range for data collection/°              | 4.228 to 72.506                                               |
| Index ranges                                | -14 ≤ h ≤ 9, -37 ≤ k ≤ 37, -10 ≤ l ≤ 10                       |
| Reflections collected                       | 17651                                                         |
| Independent reflections                     | 5737 [R <sub>int</sub> = 0.0240, R <sub>sigma</sub> = 0.0254] |
| Data/restraints/parameters                  | 5737/0/309                                                    |
| Goodness-of-fit on F <sup>2</sup>           | 1.039                                                         |
| Final R indexes [I >= 2σ (I)]               | R <sub>1</sub> = 0.0353, wR <sub>2</sub> = 0.0884             |
| Final R indexes [all data]                  | R <sub>1</sub> = 0.0416, wR <sub>2</sub> = 0.0922             |
| Largest diff. peak/hole / e Å <sup>-3</sup> | 0.33/-0.17                                                    |
| Flack parameter                             | 0.2(2)                                                        |

Table S2. Conquest structure search results using the name and structure of Artemisinin

| CCDC database identifier | Compound Name                                                                                 | Space Group                                       | Cell: a, b, c (Å)                    | Cell: $\alpha$ , $\beta$ , $\gamma$ (°)      |
|--------------------------|-----------------------------------------------------------------------------------------------|---------------------------------------------------|--------------------------------------|----------------------------------------------|
| ADAHAP                   | 9,10-Dehydroxyartemisinin                                                                     | P<br>2 <sub>1</sub> 2 <sub>1</sub> 2 <sub>1</sub> | a 6.2460<br>b 9.0416<br>c 25.132     | $\alpha$ 90<br>$\beta$ 90<br>$\gamma$ 90     |
| ANIWEA                   | (9S, 10S)-9-epideoxydihydroartemisinin                                                        | P 2 <sub>1</sub> (4)                              | a 13.73020<br>b 9.12650<br>c 17.1569 | $\alpha$ 90<br>$\beta$ 90<br>$\gamma$ 90     |
| EBIWIV                   | 10 $\beta$ -(p-methoxyphenoxy)-dihydroartemisinin                                             | P<br>2 <sub>1</sub> 2 <sub>1</sub> 2 <sub>1</sub> | a 10.238<br>b 10.720<br>c 18.818     | $\alpha$ 90°<br>$\beta$ 90°<br>$\gamma$ 90°  |
| EBIWIV01                 | 10 $\beta$ -(p-methoxyphenoxy)-dihydroartemisinin                                             | P<br>2 <sub>1</sub> 2 <sub>1</sub> 2 <sub>1</sub> | a 10.238<br>b 10.720<br>c 18.818     | $\alpha$ 90<br>$\beta$ 90<br>$\gamma$ 90     |
| FAWBEK                   | 1S,3R,5aS,6R,8aS,9R,12R-Desoxyartemisinin                                                     | P<br>2 <sub>1</sub> 2 <sub>1</sub> 2 <sub>1</sub> | a 12.706<br>b 17.998<br>c 6.226      | $\alpha$ 90<br>$\beta$ 90<br>$\gamma$ 90     |
| FIZMOS                   | 10-Aminoartemisinin                                                                           | P<br>2 <sub>1</sub> 2 <sub>1</sub> 2 <sub>1</sub> | a 5.6539<br>b 14.2347<br>c 18.9058   | $\alpha$ 90<br>$\beta$ 90<br>$\gamma$ 90     |
| GISRIK                   | 7 $\beta$ -Hydroxyartemisinin                                                                 | P<br>2 <sub>1</sub> 2 <sub>1</sub> 2 <sub>1</sub> | a 6.3047<br>b 9.1266<br>c 24.5309    | $\alpha$ 90<br>$\beta$ 90<br>$\gamma$ 90     |
| IDOYUV                   | 9,9',16,16'-Tetrahydro-9,16'-biartemisitenone                                                 | P2 <sub>1</sub>                                   | a 9.214<br>b 11.282<br>c 14.181      | $\alpha$ 90<br>$\beta$ 90<br>$\gamma$ 90     |
| ISIMEF                   | 11-azaartemisinin 5-bromosalicylic acid                                                       | P 2 <sub>1</sub>                                  | a 9.9325<br>b 9.0196<br>c 12.3942    | $\alpha$ 90<br>$\beta$ 93.844<br>$\gamma$ 90 |
| ISIMOP                   | 11-azaartemisinin 4-bromosalicylic acid                                                       | P 2 <sub>1</sub>                                  | a 11.0814<br>b 9.28293<br>c 11.1404  | $\alpha$ 90<br>$\beta$ 98.638<br>$\gamma$ 90 |
| JAQTED                   | Artemisinin                                                                                   | P<br>2 <sub>1</sub> 2 <sub>1</sub> 2 <sub>1</sub> | a 6.32081<br>b 9.31057<br>c 23.9696  | $\alpha$ 90<br>$\beta$ 90<br>$\gamma$ 90     |
| JABDUO                   | 5-azido-1,5,9-trimethyl-11,14,15,16-tetraoxatetracyclo[10.3.1.0.4,13.0.8,13] hexadecan-10-one | P2 <sub>1</sub>                                   | a 6.359<br>b 22.998<br>c 32.023      | $\alpha$ 90<br>$\beta$ 90<br>$\gamma$ 90     |

|          |                                                                |                                                   |                                      |                                                       |
|----------|----------------------------------------------------------------|---------------------------------------------------|--------------------------------------|-------------------------------------------------------|
| JEXGUO   | (+)-4,5-Secoartemisinin                                        | P 2 <sub>1</sub> /n                               | a 9.957<br>b 9.212<br>c 15.965       | $\alpha$ 90<br>$\beta$ 93.15<br>$\gamma$ 90           |
| JUXGOY   | Artemisinin epoxide                                            | P<br>2 <sub>1</sub> 2 <sub>1</sub> 2 <sub>1</sub> | a 9.092<br>b 25.250<br>c 6.273       | $\alpha$ 90<br>$\beta$ 90<br>$\gamma$ 90              |
| MEZQIU   | 11-aza-artemisinin trans-cinnamic acid                         | P 1 (1)                                           | a 9.5552<br>b 10.3175<br>c 11.9645   | $\alpha$ 91.085<br>$\beta$ 110.515<br>$\gamma$ 93.998 |
| MEZQOA   | 11-aza-artemisinin maleic acid                                 | P<br>2 <sub>1</sub> 2 <sub>1</sub> 2 <sub>1</sub> | a 9.62162<br>b 10.4023<br>c 19.6935  | $\alpha$ 90<br>$\beta$ 90<br>$\gamma$ 90              |
| MEZQUG   | bis(11-aza-artemisinin) maleic acid                            | P<br>2 <sub>1</sub> 2 <sub>1</sub> 2 <sub>1</sub> | a 9.78850<br>b 9.99650<br>c 33.7661  | $\alpha$ 90<br>$\beta$ 90<br>$\gamma$ 90              |
| MEZRAN   | bis(11-aza-artemisinin) fumaric acid                           | P 2 <sub>1</sub>                                  | a 9.57929<br>b 10.05214<br>c 17.7765 | $\alpha$ 90<br>$\beta$ 96.4731<br>$\gamma$ 90         |
| OZIDAD   | 10-Aminoartemisinin                                            | P<br>2 <sub>1</sub> 2 <sub>1</sub> 2 <sub>1</sub> | a 9.2901<br>b 9.3435<br>c 17.2037    | $\alpha$ 90<br>$\beta$ 90<br>$\gamma$ 90              |
| PICTON   | 6-(4-bromobenzoyl)-9-desmethyl-6-aza-artemisinin               | P 2 <sub>1</sub>                                  | a 8.7395<br>b 8.7830<br>c 11.9719    | $\alpha$ 90<br>$\beta$ 95.873<br>$\gamma$ 90          |
| QEYCEC   | (R)-2-(4-Bromophenyl)-2-(dihydroartemisininyloxy) acetonitrile | P 2 <sub>1</sub>                                  | a 11.634<br>b 8.354<br>c 11.828      | $\alpha$ 90<br>$\beta$ 96.54<br>$\gamma$ 90           |
| QNGHSU   | Artemisinin                                                    | P<br>2 <sub>1</sub> 2 <sub>1</sub> 2 <sub>1</sub> | a 24.077<br>b 9.443<br>c 6.356       | $\alpha$ 90<br>$\beta$ 90<br>$\gamma$ 90              |
| QNGHSU01 | Artemisinin                                                    | P 1                                               | a 9.891<br>b 15.343<br>c 9.881       | $\alpha$ 90.92<br>$\beta$ 102.99<br>$\gamma$ 93.28    |
| QNGHSU02 | Artemisinin                                                    | P<br>2 <sub>1</sub> 2 <sub>1</sub> 2 <sub>1</sub> | a 9.450<br>b 24.090<br>c 6.364       | $\alpha$ 90<br>$\beta$ 90<br>$\gamma$ 90              |
| QNGHSU03 | Artemisinin                                                    | P<br>2 <sub>1</sub> 2 <sub>1</sub> 2 <sub>1</sub> | a 6.3543<br>b 9.439<br>c 24.066      | $\alpha$ 90<br>$\beta$ 90<br>$\gamma$ 90              |
| QNGHSU10 | Artemisinin                                                    | P<br>2 <sub>1</sub> 2 <sub>1</sub> 2 <sub>1</sub> | a 6.373<br>b 9.452<br>c 24.106       | $\alpha$ 90<br>$\beta$ 90<br>$\gamma$ 90              |
| QNGHSU11 | (+)-Artemisinin                                                | P<br>2 <sub>1</sub> 2 <sub>1</sub> 2 <sub>1</sub> | a 6.3618<br>b 9.4621<br>c 24.087     | $\alpha$ 90<br>$\beta$ 90<br>$\gamma$ 90              |

|        |                                                                         |                                                |                                       |                                               |
|--------|-------------------------------------------------------------------------|------------------------------------------------|---------------------------------------|-----------------------------------------------|
| RIQKOS | N-(Methanesulfonyl)-11-aza-artemisinin                                  | P 2 <sub>1</sub>                               | a 8.5196<br>b 10.7659<br>c 9.8361     | $\alpha$ 90<br>$\beta$ 113.450<br>$\gamma$ 90 |
| ROMMOW | 12-(3-hydroxy,5-hydroxymethyl)phenoxy dihydroartemisinin                | P 2 <sub>1</sub>                               | a 10.3088<br>b 10.2844<br>c 10.3218   | $\alpha$ 90<br>$\beta$ 113.140<br>$\gamma$ 90 |
| SIKLAZ | 12-(3-hydroxy,5-hydroxymethyl)phenoxy dihydroartemisinin                | P 2 <sub>1</sub> 2 <sub>1</sub> 2 <sub>1</sub> | a 10.133<br>b 10.633<br>c 18.461      | $\alpha$ 90<br>$\beta$ 90<br>$\gamma$ 90      |
| TAFWUT | 10 $\beta$ -(4'-Fluorophenyl)-10-deoxo-10-dihydroartemisinin            | P 2 <sub>1</sub> 2 <sub>1</sub> 2 <sub>1</sub> | a 6.0150<br>b 14.2590<br>c 22.075     | $\alpha$ 90<br>$\beta$ 90<br>$\gamma$ 90      |
| TAFXAA | 10 $\beta$ -(9'-Phenanthryl)-10-deoxo-10-dihydroartemisinin             | P 4 <sub>3</sub>                               | a 9.3690<br>b 9.3690<br>c 26.782      | $\alpha$ 90<br>$\beta$ 90<br>$\gamma$ 90      |
| TAFXEE | 10 $\beta$ -(4'-(1"-Morpholino)phenyl)-10-deoxo-10-dihydroartemisinin   | P 2 <sub>1</sub>                               | a 8.427<br>b 6.202<br>c 22.557        | $\alpha$ 90<br>$\beta$ 99.23<br>$\gamma$ 90   |
| TAFX11 | 10 $\beta$ -(4'-N,N-Dimethylaminophenyl)-10-deoxo-10-dihydroartemisinin | P 2 <sub>1</sub> 2 <sub>1</sub> 2 <sub>1</sub> | a 6.3560<br>b 17.932<br>c 18.651      | $\alpha$ 90<br>$\beta$ 90<br>$\gamma$ 90      |
| TAFXOO | 10 $\alpha$ -(2'-Methoxynaphthyl)-10-deoxo-10-dihydroartemisinin        | P 2 <sub>1</sub> 2 <sub>1</sub> 2 <sub>1</sub> | a 10.2137<br>b 10.6084<br>c 40.654    | $\alpha$ 90<br>$\beta$ 90<br>$\gamma$ 90      |
| TALCOA | Artemisinin hemikis (resorcinol)                                        | P 2 <sub>1</sub>                               | a 9.5298<br>b 17.3699<br>c 10.4197    | $\alpha$ 90<br>$\beta$ 94.0170<br>$\gamma$ 90 |
| TALCUG | Artemisinin orcinol                                                     | P 2 <sub>1</sub> 2 <sub>1</sub> 2 <sub>1</sub> | a 9.0658<br>b 14.1061<br>c 16.5554    | $\alpha$ 90<br>$\beta$ 90<br>$\gamma$ 90      |
| TAZNIR | (1aS,3S,5aS,6R,8aS,9R,12S)-10-Deoxo-13-carba-artemisinin                | P 2 <sub>1</sub> 2 <sub>1</sub> 2 <sub>1</sub> | a 9.304<br>b 14.130<br>c 21.876       | $\alpha$ 90<br>$\beta$ 90<br>$\gamma$ 90      |
| TAZNOX | (+)-10-Deoxo-13-carba-artemisinin                                       | P 2 <sub>1</sub> 2 <sub>1</sub> 2 <sub>1</sub> | a 5.833<br>b 9.485<br>c 27.164        | $\alpha$ 90<br>$\beta$ 90<br>$\gamma$ 90      |
| VESWOI | 11-azaartemisinin                                                       | P 3 <sub>2</sub>                               | a 11.71759<br>b 11.71759<br>c 9.48728 | $\alpha$ 90<br>$\beta$ 90<br>$\gamma$ 120     |
| VESYAW | bis(11-Azaartemisinin) pimelic acid                                     | P 2 <sub>1</sub> 2 <sub>1</sub> 2              | a 17.5836<br>b 10.3594<br>c 9.9524    | $\alpha$ 90<br>$\beta$ 90<br>$\gamma$ 90      |
| WEHZUF | $\alpha$ -Dihydroartemisinin $\beta$ -dihydroartemisinin ether          | P 2 <sub>1</sub>                               | a 10.338<br>b 12.012<br>c 12.065      | $\alpha$ 90<br>$\beta$ 93.39<br>$\gamma$ 90   |

|          |                                                                                                                                           |                                                   |                                    |                                                |
|----------|-------------------------------------------------------------------------------------------------------------------------------------------|---------------------------------------------------|------------------------------------|------------------------------------------------|
| WIMMEK   | Epiartemisinin                                                                                                                            | P<br>2 <sub>1</sub> 2 <sub>1</sub> 2              | a 6.4443<br>b 9.445<br>c 23.182    | $\alpha$ 90<br>$\beta$ 90<br>$\gamma$ 90       |
| XAZPEW   | catena-(tetrakis( $\mu$ -2,4,6-tris(pyridin-4-yl)-1,3,5-triazine)-dodecakis(iodo)-hexa-zinc (+)-artemisinin t-butyl methyl ether solvate) | C 2                                               | a 35.252<br>b 14.8612<br>c 35.233  | $\alpha$ 90<br>$\beta$ 108.1167<br>$\gamma$ 90 |
| XIMLIP   | Dihydroartemisinin                                                                                                                        | P<br>2 <sub>1</sub> 2 <sub>1</sub> 2 <sub>1</sub> | a 5.5910<br>b 14.1309<br>c 18.8062 | $\alpha$ 90<br>$\beta$ 90<br>$\gamma$ 90       |
| XIMLIPO1 | 1,5,9-Trimethyl-11,14,15,16-tetraoxatetracyclo[10.3.1.04,13.08,13]hexadecan-10-ol, dihydroartemisinin                                     | P<br>2 <sub>1</sub> 2 <sub>1</sub> 2 <sub>1</sub> | a 5.5881<br>b 14.131<br>c 18.801   | $\alpha$ 90<br>$\beta$ 90<br>$\gamma$ 90       |
| ZILMUC   | 3(R)-(p-Nitrophenyl)-3-(10 $\beta$ -dihydroartemisininoxy)propionic acid                                                                  | C 2                                               | a 26.555<br>b 8.737<br>c 11.494    | $\alpha$ 90<br>$\beta$ 114.32<br>$\gamma$ 90   |
| ZILNAJ   | Ethyl 3(S)-(p-nitrophenyl)-3-(10 $\beta$ -dihydroartemisininoxy)propionate                                                                | P 2 <sub>1</sub>                                  | a 12.392<br>b 10.639<br>c 20.081   | $\alpha$ 90<br>$\beta$ 91.51<br>$\gamma$ 90    |

Table S3: Interaction site pairing energy difference ( $\Delta E$ ), the probability of cocrystal formation in a 1:1 stoichiometric ratio with ART and complementarity screening

| Rank | Cofomers                                    | $\Delta E$ (KJ mol <sup>-1</sup> ) | Probability (%) | Complementarity Screening tools |
|------|---------------------------------------------|------------------------------------|-----------------|---------------------------------|
| 1    | Amodiaquine dihydrochloride dihydrate (AQD) | -35.71                             | 100.00          | fail                            |
| 2    | Quercetin (QUC)                             | -21.32                             | 98.47           | pass                            |
| 3    | Etidronic acid (HEDP)                       | -20.78                             | 98.10           | fail                            |
| 4    | Pamoic acid (PMA)                           | -18.70                             | 95.72           | pass                            |
| 5    | Resveratrol (Trans) (RSV)                   | -18.66                             | 95.65           | fail                            |
| 6    | Acetylenedicarboxylic acid (ACA)            | -18.52                             | 95.40           | fail                            |
| 7    | Oxalic acid (OXA)                           | -17.23                             | 92.51           | fail                            |
| 8    | Furosemide (FUR)                            | -15.77                             | 87.26           | fail                            |
| 9    | 4-aminobenzoic acid (ABA)                   | -15.32                             | 85.10           | pass                            |
| 10   | Niflumic acid (NFA)                         | -15.29                             | 84.92           | pass                            |
| 11   | Flufenamic acid (FFA)                       | -15.00                             | 83.39           | pass                            |
| 12   | Hydrochlorothiazide (HCT)                   | -14.07                             | 77.50           | fail                            |
| 13   | Riboflavin (RFN)                            | -13.56                             | 73.72           | fail                            |
| 14   | 2-amino-5-methylbenzoic acid (AMBA)         | -13.10                             | 70.02           | fail                            |
| 15   | Hesperetin (HES)                            | -12.79                             | 67.31           | pass                            |
| 16   | Phthalamide (PTA)                           | -12.30                             | 62.85           | pass                            |
| 17   | Biotin (BIO)                                | -12.28                             | 62.67           | pass                            |
| 18   | Acedoben (ADB)                              | -11.19                             | 51.96           | fail                            |
| 19   | 4-hydroxybenzoic acid (HBA)                 | -11.12                             | 51.17           | fail                            |
| 20   | 4-hydroxybenzohydrazide (HBD)               | -11.08                             | 50.85           | fail                            |
| 21   | Tryptophan                                  | -9.12                              | 31.92           | pass                            |
| 22   | Cyclamic acid                               | -8.95                              | 30.44           | fail                            |
| 23   | Tolfenamic acid                             | -8.81                              | 29.28           | pass                            |
| 24   | L-Glutamic acid                             | -8.70                              | 28.37           | pass                            |
| 25   | EDTA                                        | -8.53                              | 27.00           | pass                            |
| 26   | Maltitol                                    | -8.42                              | 26.12           | pass                            |
| 27   | L-Methionine                                | -8.41                              | 26.05           | pass                            |
| 28   | Xylitol                                     | -8.41                              | 26.04           | pass                            |
| 29   | Piroxicam                                   | -8.39                              | 25.84           | pass                            |
| 30   | L-Leucine                                   | -7.90                              | 22.30           | pass                            |
| 31   | T-Butylhydroxyanisole                       | -7.64                              | 20.50           | fail                            |
| 32   | T-Butylamine                                | -7.64                              | 20.50           | fail                            |
| 33   | Cholic acid                                 | -7.44                              | 19.23           | fail                            |
| 34   | Atenolol                                    | -7.34                              | 18.58           | fail                            |
| 35   | Glutaric acid                               | -7.32                              | 18.48           | fail                            |
| 36   | Alitame                                     | -7.11                              | 17.22           | fail                            |
| 37   | Carbamazepine                               | -6.82                              | 15.61           | pass                            |
| 38   | Aspartame                                   | -6.79                              | 15.49           | pass                            |
| 39   | Folic acid                                  | -6.67                              | 14.87           | pass                            |
| 40   | Mefenamic acid                              | -6.62                              | 14.61           | fail                            |
| 41   | Acetophenone Oxime                          | -6.61                              | 14.56           | fail                            |
| 42   | Indomethacin                                | -6.60                              | 14.49           | pass                            |
| 43   | Meglumine                                   | -6.34                              | 13.26           | fail                            |
| 44   | Camphoric acid                              | -5.95                              | 11.53           | pass                            |
| 45   | Itraconazole                                | -5.79                              | 10.88           | fail                            |
| 46   | Z-L-Glutamic acid                           | -5.77                              | 10.81           | fail                            |

|    |                           |       |       |      |
|----|---------------------------|-------|-------|------|
| 47 | Pimelic acid              | -5.75 | 10.75 | pass |
| 48 | Cinnamic acid (Trans)     | -5.61 | 10.21 | pass |
| 49 | Z-L-Aspartic acid         | -5.57 | 10.07 | fail |
| 50 | Isonicotinamide           | -5.40 | 9.44  | pass |
| 51 | Azelaic acid              | -5.15 | 8.64  | fail |
| 52 | 4,4-bipyridine            | -4.84 | 7.70  | fail |
| 53 | Imidazole                 | -4.74 | 7.40  | fail |
| 54 | Methylparaben             | -4.45 | 6.64  | fail |
| 55 | Capsaicin                 | -4.28 | 6.23  | fail |
| 56 | D-Phenylalanine           | -4.19 | 6.01  | fail |
| 57 | Adipic acid               | -4.15 | 5.93  | fail |
| 58 | Monobutyryn               | -3.89 | 5.37  | pass |
| 59 | Acesulfame K              | -3.72 | 5.04  | pass |
| 60 | Hydroxycinnamic acid      | -3.64 | 4.89  | fail |
| 61 | Isonicotinic acid         | -3.20 | 4.12  | pass |
| 62 | Aspirin                   | -3.17 | 4.07  | pass |
| 63 | Propranolol               | -3.13 | 4.02  | pass |
| 64 | Propylparaben             | -3.01 | 3.83  | pass |
| 65 | Ketoprofen                | -2.96 | 3.76  | pass |
| 66 | Nicotinic acid            | -2.82 | 3.55  | fail |
| 67 | Triphenylacetic acid      | -2.77 | 3.49  | fail |
| 68 | Sorbic acid               | -2.75 | 3.46  | fail |
| 69 | Nadolol                   | -2.30 | 2.91  | fail |
| 70 | Ethylparaben              | -2.23 | 2.82  | fail |
| 71 | Pyrazine                  | -2.22 | 2.82  | fail |
| 72 | 2-aminopyrazine           | -2.18 | 2.77  | fail |
| 73 | L-Proline                 | -2.16 | 2.75  | pass |
| 74 | D-Pantothenol (Panthenol) | -2.09 | 2.67  | pass |
| 75 | Caprolactam (Epsilon)     | -1.68 | 2.28  | pass |
| 76 | Valerolactam (Delta)      | -1.62 | 2.22  | pass |
| 77 | Piracetam                 | -1.60 | 2.21  | fail |
| 78 | Praziquantel              | -1.53 | 2.14  | pass |
| 79 | D-Proline                 | -0.83 | 1.62  | pass |
| 80 | 3-Methylpyridine          | -0.70 | 1.54  | fail |



Table S4: MEPSs of top 20 coformers

| Ranking | coformer                                          | MEPS                                                                                 |
|---------|---------------------------------------------------|--------------------------------------------------------------------------------------|
| 1       | Amodiaquine<br>dihydrochloride<br>dihydrate (AQD) | 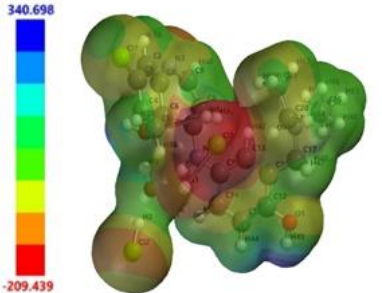   |
| 2       | Quercetin (QUC)                                   |   |
| 3       | Etidronic acid (HEDP)                             |  |
| 4       | Pamoic acid (PMA)                                 |  |

|   |                                     |                                                                                      |
|---|-------------------------------------|--------------------------------------------------------------------------------------|
| 5 | Resveratrol (Trans)<br>(RSV)        | 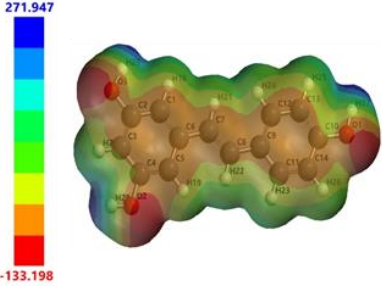   |
| 6 | Acetylenedicarboxylic<br>acid (ACA) |    |
| 7 | Oxalic acid (OXA)                   |   |
| 8 | Furosemide (FUR)                    |  |
| 9 | 4-aminobenzoic acid<br>(ABA)        |  |

|    |                           |                                                                                      |
|----|---------------------------|--------------------------------------------------------------------------------------|
| 10 | Niflumic acid (NFA)       | 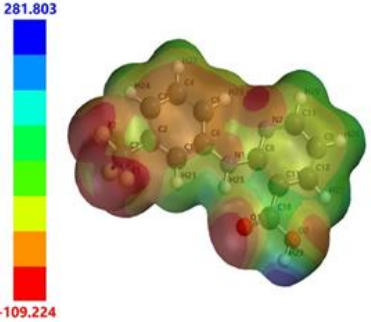   |
| 11 | Flufenamic acid (FFA)     |    |
| 12 | Hydrochlorothiazide (HCT) |   |
| 13 | Riboflavin (RFN)          |  |

|    |                                     |                                                                                      |
|----|-------------------------------------|--------------------------------------------------------------------------------------|
| 14 | 2-amino-5-methylbenzoic acid (AMBA) | 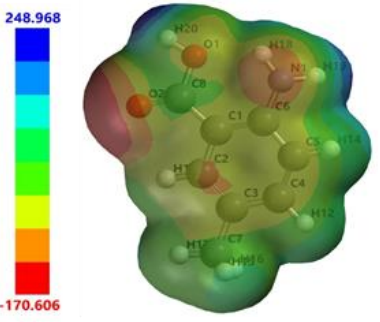   |
| 15 | Hesperetin (HES)                    |    |
| 16 | Phthalamide (PTA)                   |   |
| 17 | Biotin (BIO)                        |  |

|    |                               |                                                                                                                 |
|----|-------------------------------|-----------------------------------------------------------------------------------------------------------------|
| 18 | Acedoben (ADB)                | 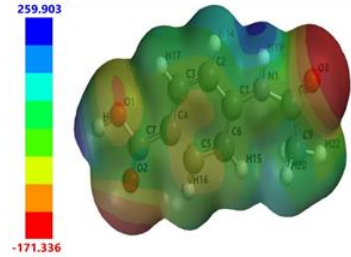 <p>259.903<br/>-171.336</p>  |
| 19 | 4-hydroxybenzoic acid (HBA)   |  <p>305.404<br/>-164.304</p>  |
| 20 | 4-hydroxybenzohydrazide (HBD) |  <p>304.043<br/>-189.964</p> |

Table S5: PXRD patterns of experimental screening

| Ranking | coformer | PXRD pattern                                                                                                                                                                                                                                                                      |
|---------|----------|-----------------------------------------------------------------------------------------------------------------------------------------------------------------------------------------------------------------------------------------------------------------------------------|
| (1)     | AQD      | <p>ART-AQD (EA)<br/>           ART-AQD (AC)<br/>           ART-AQD (ETOH)<br/>           ART-AQD (MEOH)<br/>           ART-AQD (NG)<br/>           Amodiaquine dihydrochloride dihydrate (NG)<br/>           Amodiaquine dihydrochloride dihydrate<br/>           Artemisinin</p> |
| (2)     | QUC      | <p>ART-QUC (EA)<br/>           ART-QUC (AC)<br/>           ART-QUC (ETOH)<br/>           ART-QUC (MEOH)<br/>           ART-QUC (NG)<br/>           Quercetin (NG)<br/>           Quercetin<br/>           Artemisinin</p>                                                         |
| (3)     | HEDP     | <p>ART-HEDP (EA)<br/>           ART-HEDP (AC)<br/>           ART-HEDP (ETOH)<br/>           ART-HEDP (MEOH)<br/>           ART-HEDP (NG)<br/>           Etidronic acid (NG)<br/>           Etidronic acid<br/>           Artemisinin</p>                                          |

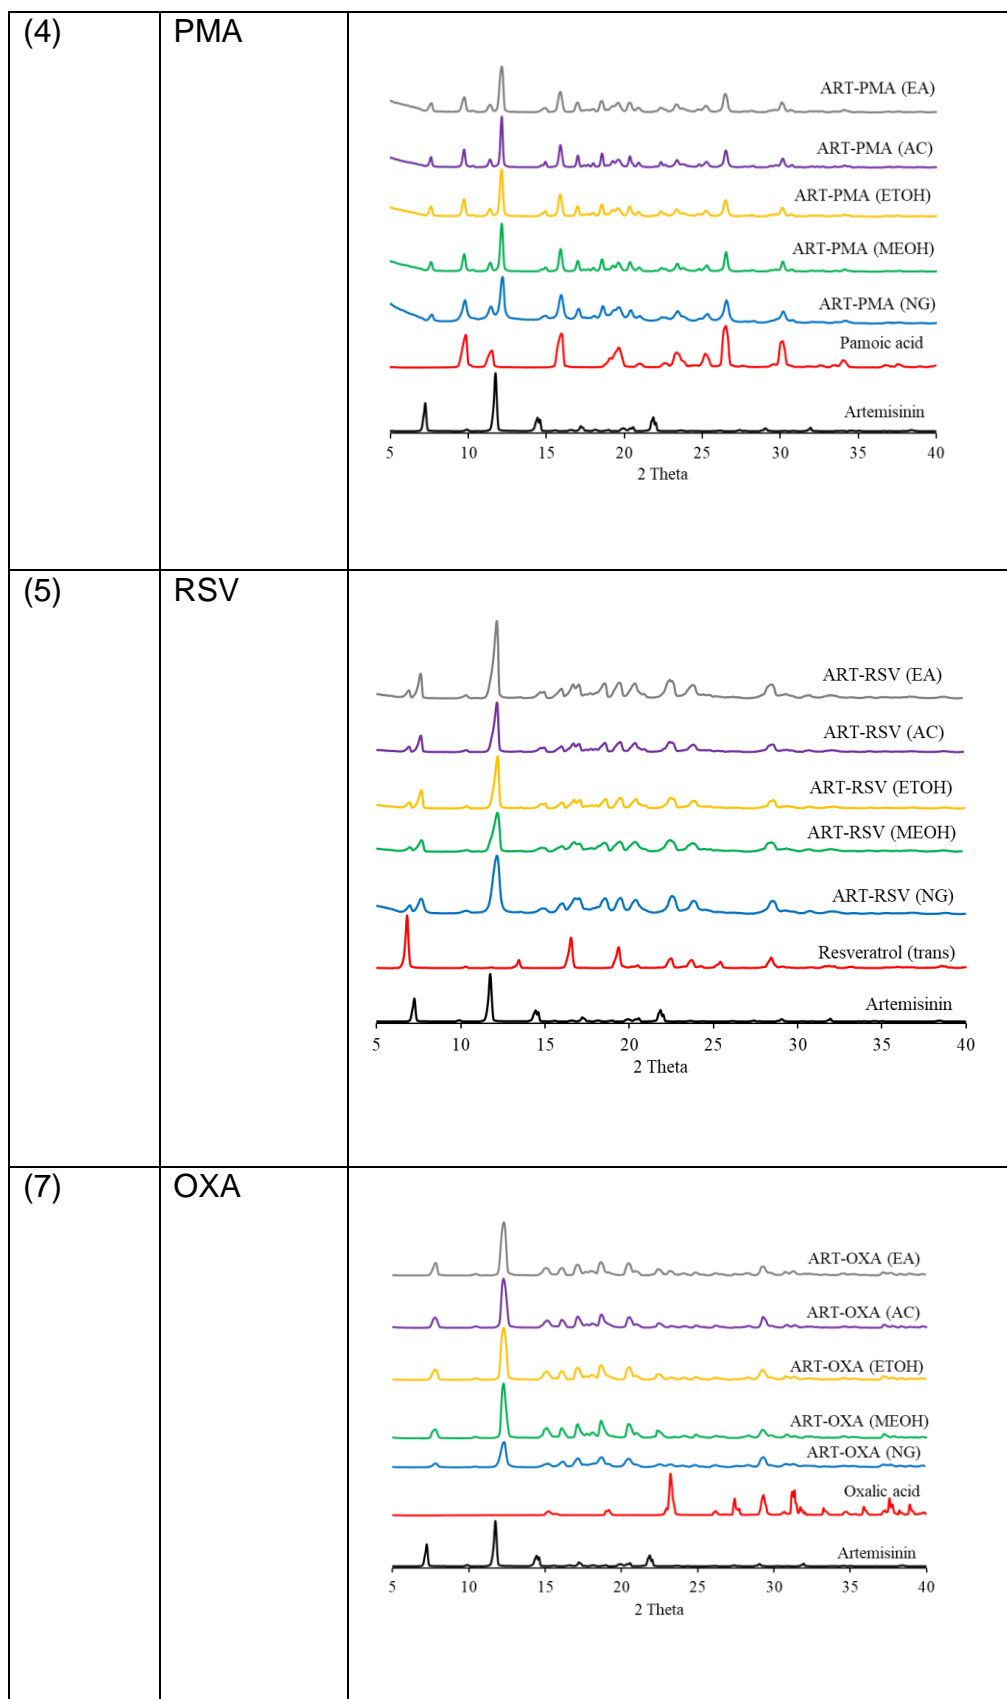

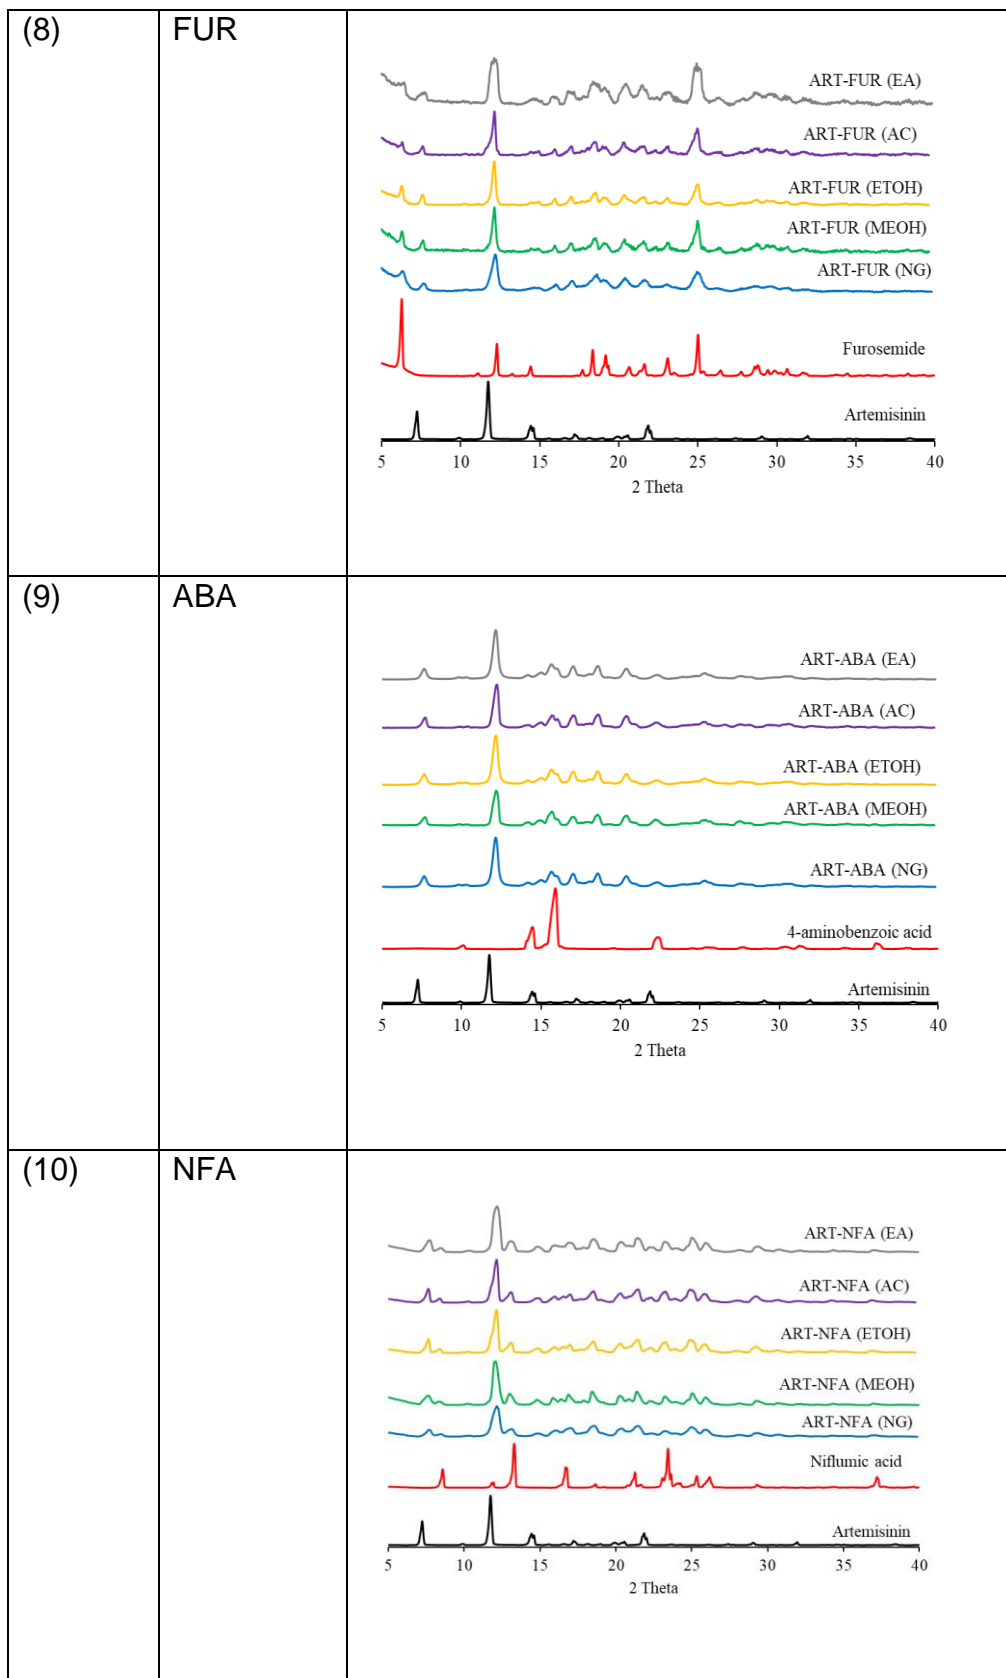



|      |     |                                                                                                                                                                                                                                                                                                       |
|------|-----|-------------------------------------------------------------------------------------------------------------------------------------------------------------------------------------------------------------------------------------------------------------------------------------------------------|
| (11) | FFA | 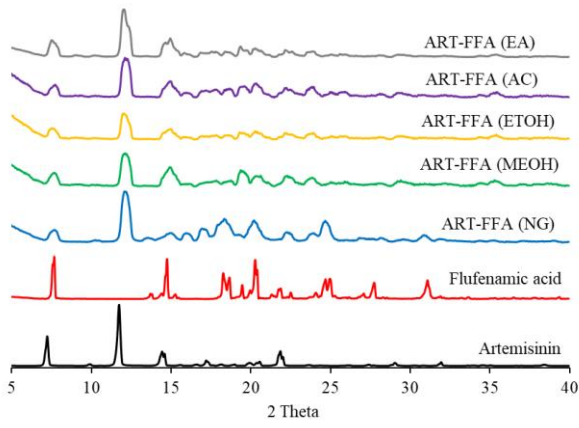 <p>ART-FFA (EA)<br/> ART-FFA (AC)<br/> ART-FFA (ETOH)<br/> ART-FFA (MEOH)<br/> ART-FFA (NG)<br/> Flufenamic acid<br/> Artemisinin</p> <p>5 10 15 20 25 30 35 40<br/>2 Theta</p>                                    |
| (12) | HCT |  <p>ART-HCT (EA)<br/> ART-HCT (AC)<br/> ART-HCT (ETOH)<br/> ART-HCT (MEOH)<br/> ART-HCT (NG)<br/> Hydrochlorothiazide (NG)<br/> Hydrochlorothiazide<br/> Artemisinin</p> <p>5 10 15 20 25 30 35 40<br/>2 Theta</p> |
| (13) | RFN |  <p>ART-RFN (EA)<br/> ART-RFN (AC)<br/> ART-RFN (ETOH)<br/> ART-RFN (MEOH)<br/> ART-RFN (NG)<br/> Riboflavin<br/> Artemisinin</p> <p>5 10 15 20 25 30 35 40<br/>2 Theta</p>                                       |

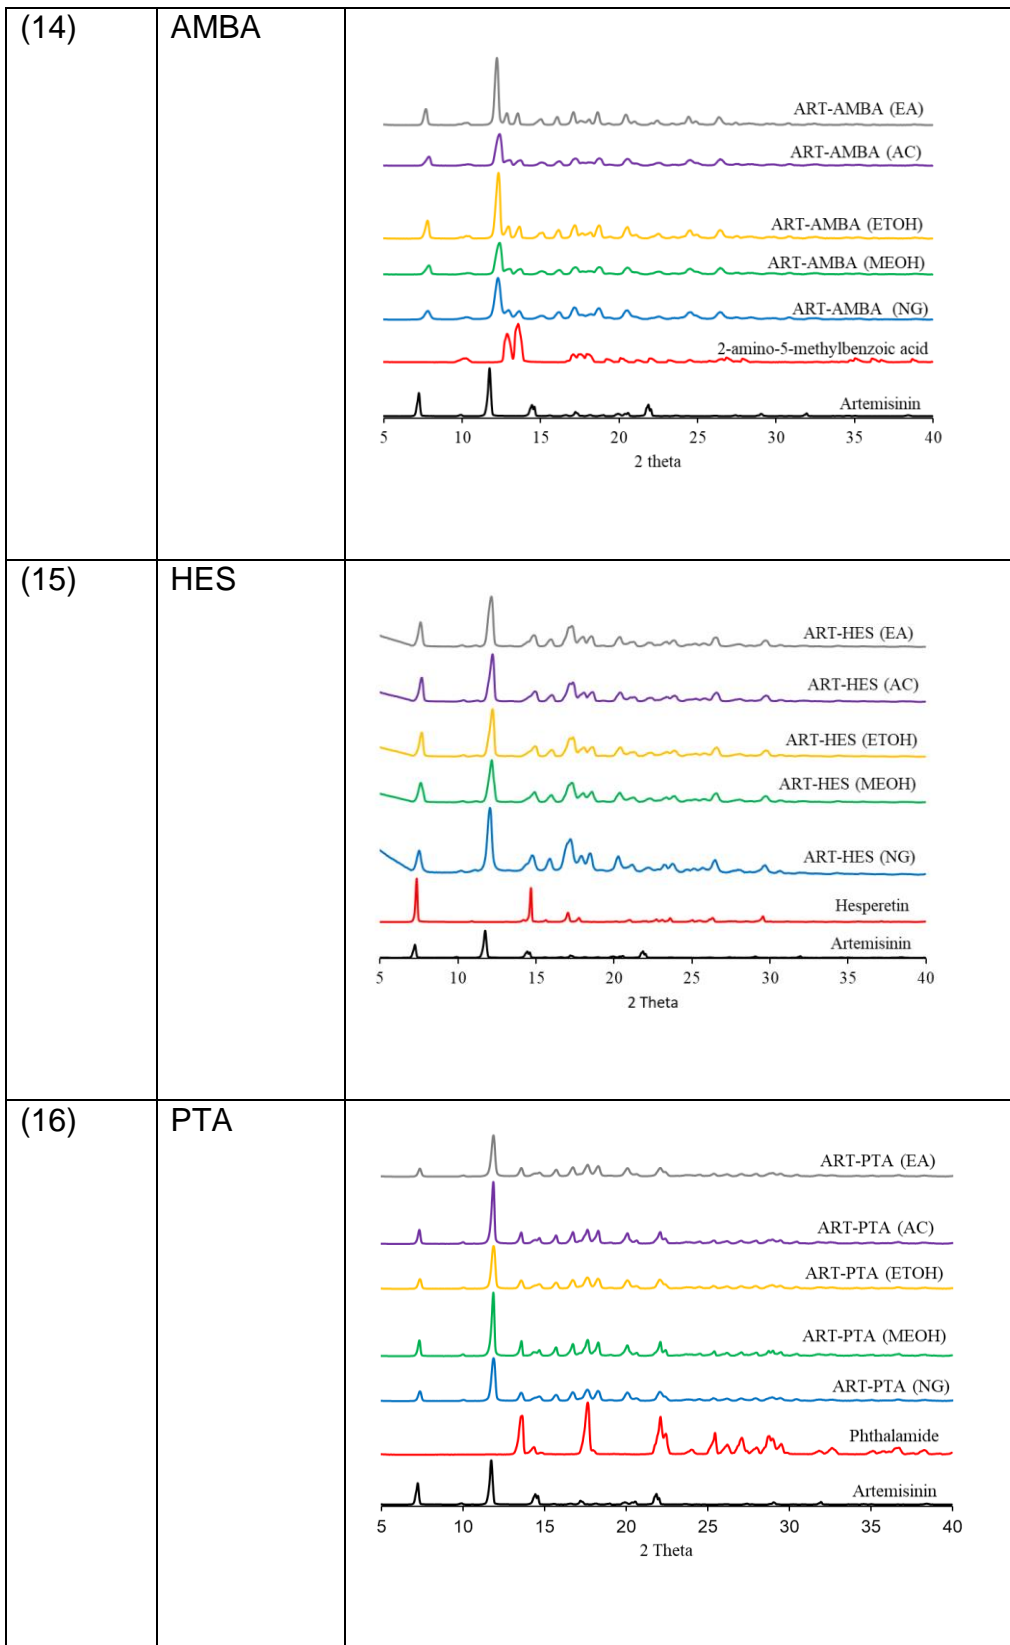

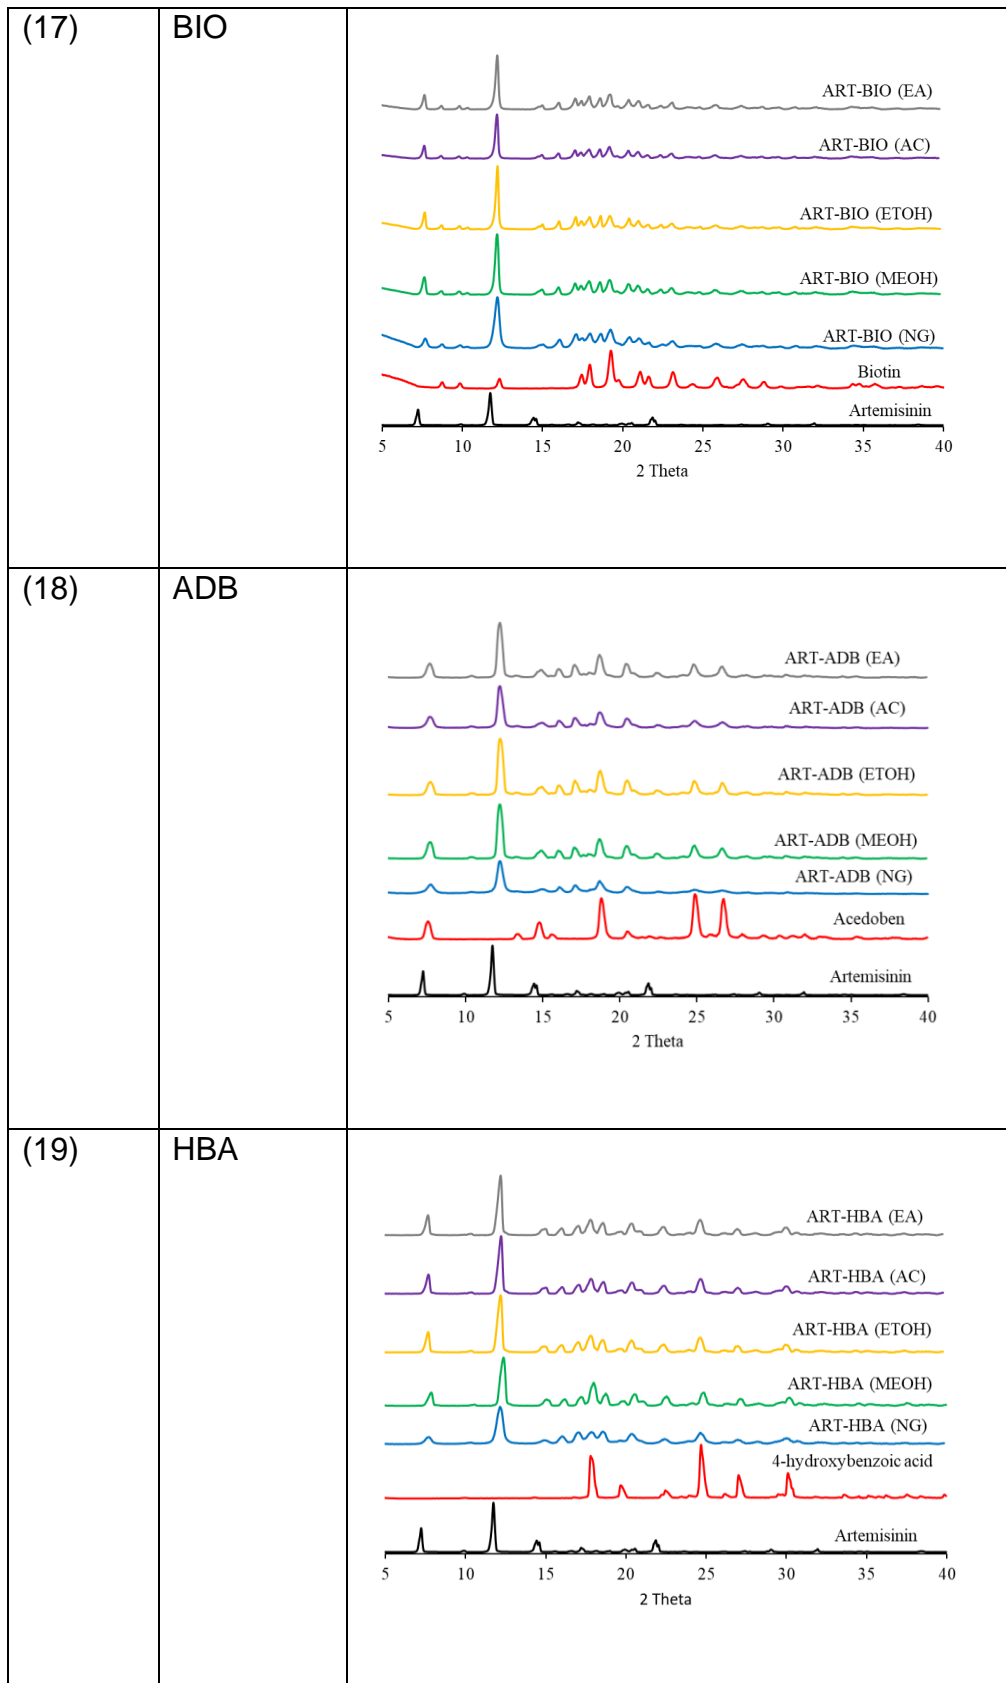

(20)

HBD

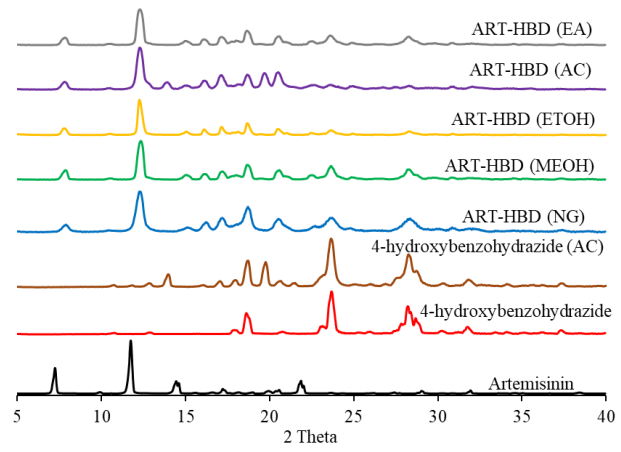

Table S6: Calibration models of ART on HPLC and ACA on UV. The concentration units are in  $\mu\text{g/mL}$ ;  $C_r$ : real concentration of validation sample (theoretical) and  $C_m$ : measured concentration of validation sample

| Calibration Curve range ( $\mu\text{g/mL}$ ) | Concentration points ( $\mu\text{g/mL}$ ) | Calibration graph                                                                    | Validation samples         |                            |                                    |
|----------------------------------------------|-------------------------------------------|--------------------------------------------------------------------------------------|----------------------------|----------------------------|------------------------------------|
|                                              |                                           |                                                                                      | $C_r$ ( $\mu\text{g/mL}$ ) | $C_m$ ( $\mu\text{g/mL}$ ) | $\frac{C_m - C_r}{C_r} \times 100$ |
| <b>ART</b>                                   |                                           |                                                                                      |                            |                            |                                    |
| 5-100                                        | 5, 10, 20, 40, 50 and 100                 | 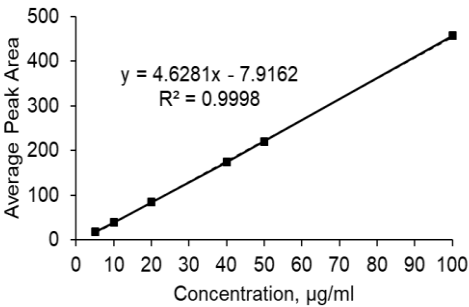   | 15                         | 14.96                      | 0.30                               |
|                                              |                                           |                                                                                      | 30                         | 30.06                      | 0.20                               |
|                                              |                                           |                                                                                      | 60                         | 61.50                      | 2.50                               |
| <b>ACA</b>                                   |                                           |                                                                                      |                            |                            |                                    |
| 20-400                                       | 20, 40, 50, 100, 200, 300, 400            |  | 30                         | 30.58                      | 1.94                               |
|                                              |                                           |                                                                                      | 60                         | 61.83                      | 3.06                               |
|                                              |                                           |                                                                                      | 150                        | 148.50                     | 1.00                               |

Table S7: calibration models of ART on HPLC and ACA on UV by a mixture of ART and ACA. The concentration units are in  $\mu\text{g/mL}$ ;  $C_r$ : real concentration of validation sample (theoretical) and  $C_m$ : measured concentration of validation sample

| Validation samples         |                            |                                    |
|----------------------------|----------------------------|------------------------------------|
| ART                        |                            |                                    |
| $C_r$ ( $\mu\text{g/mL}$ ) | $C_m$ ( $\mu\text{g/mL}$ ) | $\frac{C_m - C_r}{C_r} \times 100$ |
| 25                         | 24.53                      | 1.87                               |
| 50                         | 48.82                      | 2.37                               |
| ACA                        |                            |                                    |
| $C_r$ ( $\mu\text{g/mL}$ ) | $C_m$ ( $\mu\text{g/mL}$ ) | $\frac{C_m - C_r}{C_r} \times 100$ |
| 25                         | 23.85                      | 4.62                               |
| 50                         | 52.31                      | 4.62                               |

Fig. S1: Comparison of DSC thermographs of ART, ACA, ART<sup>2</sup>-ACA

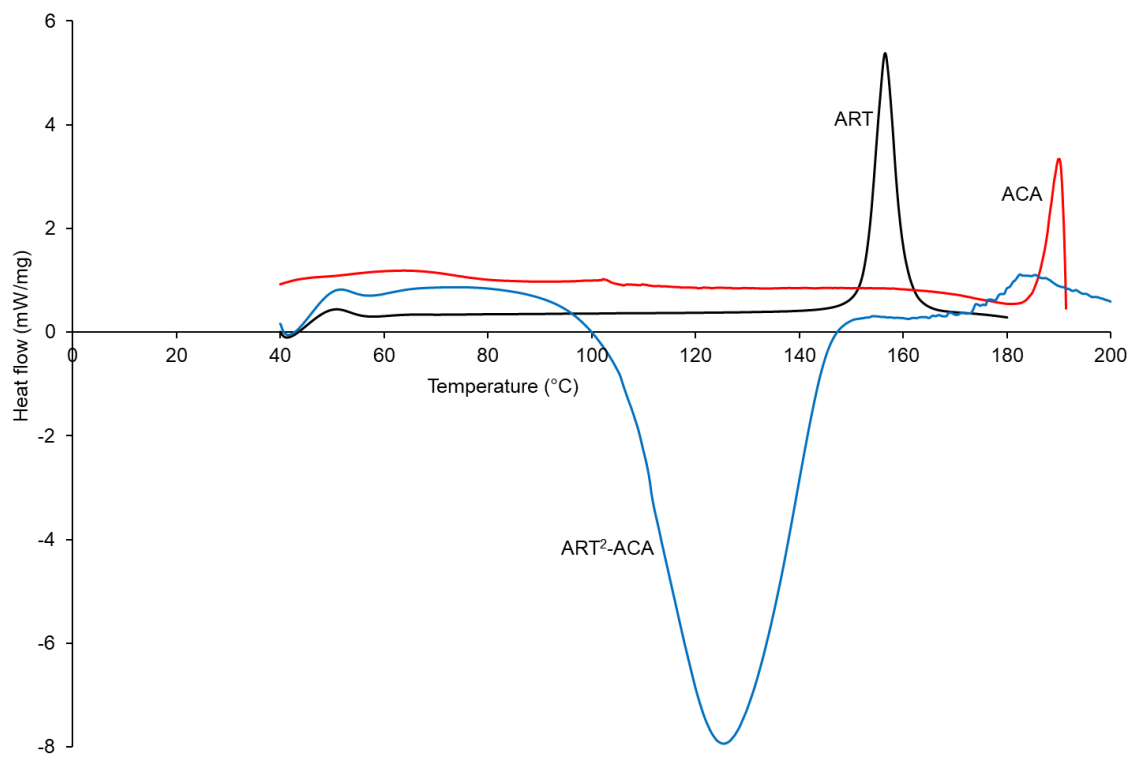

Fig. S2: UV Spectra of ART and ACA

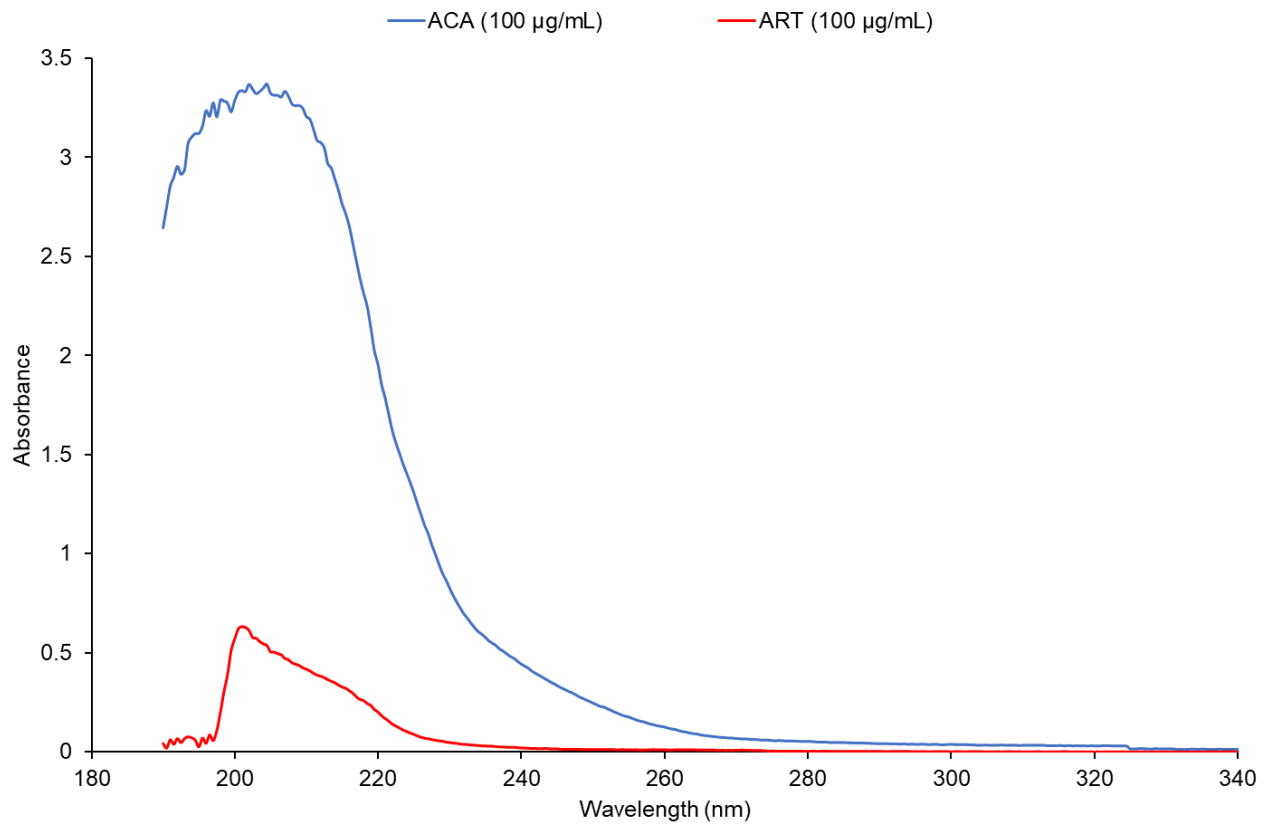



Fig. S3: PXRD patterns of solid residues after ART<sup>2</sup>-ACA dissolution tests

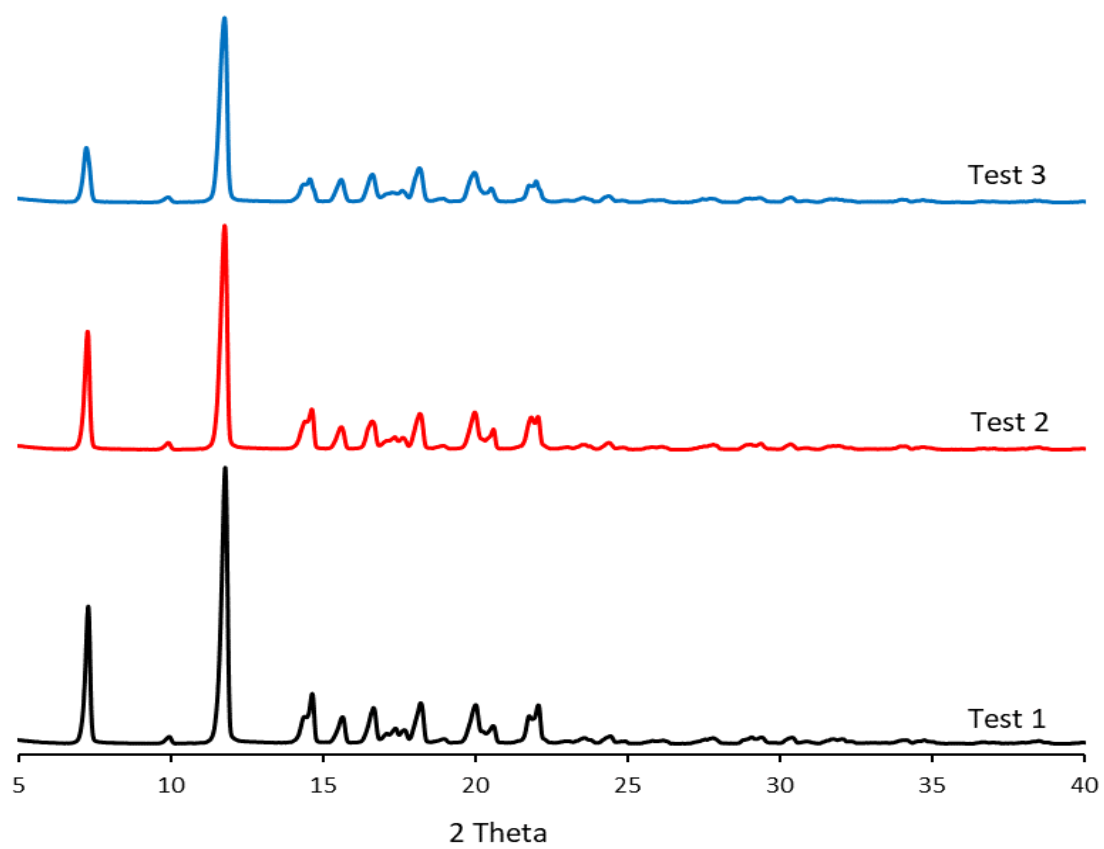

Supplement: d1ce01400e1.pdf [file d1ce01400e1.pdf]
